# Supplementary material
Source: publisher figshare collection journal article supplement (https://gsajournals.figshare.com/ndownloader/files/25010255)
Supplement: Supplementary file 1 [file 25010255]

## Sheet: Sheet1
Primers for cloning of promoters used for the transcriptional reporter analysis of XXX cell-transcribed candidate genes.
All primers start with Gateway cloning sequences, followed with the indicated sequence.
(forward: ggggacaactttgtatagaaaagtt; reverse: ggggactgcttttttgtacaaacttg)
Gene name	Forward primer	Reverse primer	Size (bp)
sdf-9	gtcgacttgtcaatgtcgc	ccttcattttgaaaataatatatctagtcttag	3497
asic-1	gacacacttgtacgggatacctt	tttggtggcctgaaatttgatcaa	1992
dhs-17	gataacacattgaccctctccac	ttctacaaattacagacgagacaactg	1969
mab-9	gccatggaacccgaatttttgcat	cttatggaataagaagctccggga	2026
twk-39	ttgtcgggtttgtcagtttcct	tttcagtcgtctatttgactgcca	2006
lgc-36	gcatcaaggaactgctttcaca	tggaaattcgatgaagcatttgtgtg	560
F14H8.2	agagttcaaaaaggtgttcccaa	agagttcaaaaaggtgttcccaa	1779
C06A1.3	ttgtctggcgtgtatttggtac	atgaagacgttgctaaatcctctttc	660
asp-9	tgacctattttgaactgctg	tcagctcaactatcaaaatttaatcac	1668
B0034.5	taatgcgtgataatgatgagac	taatgcgtgataatgatgagac	1992
F52E1.5	tccaattttatgcgttgagt	ggcaggttatttaaacggt	1580
T22E5.6	tgcaagttaatttttcgttc	tgtgaaaagctgaaatacag	2037
nlp-15	tggtcaagtacataccaggggtatg	cgttatgttgtgtctctttcg	2186
